# Supplementary material for: A Logistic Regression Model for Predicting the Risk of Subsequent Surgery among Patients with Newly Diagnosed Crohn’s Disease Using a Brute Force Method
Source: MDPI journal article supplement (doi:10.3390/diagnostics13233587), 2023-12-03
Supplement: s1 [file s1]

TableS1. Characteristics of the 14 patients who required surgery.

| Sex | Age | Disease location | HBI | Major lesions | Upper small-bowel lesions | Extensive small-bowel lesions | Anal lesions | Body weight loss | Smoking | Small-bowel patency classification | Initial treatment       |
|-----|-----|------------------|-----|---------------|---------------------------|-------------------------------|--------------|------------------|---------|------------------------------------|-------------------------|
| M   | 36  | Ileocolonic      | 5   | +             | +                         | -                             | -            | +                | -       | 2                                  | IFX                     |
| M   | 18  | Ileal            | 7   | +             | -                         | +                             | +            | -                | -       | 0                                  | ED, 5-ASA, AZP, PSL,IFX |
| M   | 54  | Ileal            | 13  | +             | -                         | +                             | -            | +                | -       | 2                                  | Surgery                 |
| M   | 32  | Ileal            | 7   | +             | -                         | +                             | -            | +                | +       | 2                                  | ED, 5-ASA, IFX          |
| F   | 29  | Ileal            | 12  | +             | -                         | +                             | -            | +                | -       | 2                                  | ED, 5-ASA, PSL, IFX     |
| M   | 19  | Ileocolonic      | 7   | +             | -                         | -                             | -            | +                | -       | 0                                  | ED,5-ASA, IFX           |
| F   | 18  | Ileocolonic      | 15  | +             | -                         | +                             | +            | +                | -       | 2                                  | Surgery                 |
| M   | 49  | Ileal            | 2   | +             | -                         | +                             | -            | -                | +       | 2                                  | Surgery                 |
| M   | 32  | Ileal            | 3   | +             | -                         | +                             | -            | +                | -       | 2                                  | ED, 5-ASA               |
| M   | 42  | Colonic          | 10  | +             | -                         | -                             | -            | +                | -       | 2                                  | ED, PSL, IFX            |
| M   | 20  | Ileocolonic      | 5   | +             | -                         | +                             | -            | +                | +       | 2                                  | ED, AZP, BUD, IFX       |
| F   | 50  | Ileal            | 2   | +             | -                         | -                             | -            | +                | -       | 2                                  | ED, 5-ASA, BUD, UST     |
| F   | 54  | Colonic          | 17  | +             | -                         | -                             | -            | +                | +       | 1                                  | ED, 5-ASA, PSL,VDZ      |
| M   | 42  | Ileal            | 1   | +             | -                         | +                             | -            | +                | -       | 0                                  | ED, 5-ASA, ADA          |

HBI: Harvey-Bradshaw index, IFX: Infliximab, ED: Elemental diet, 5-ASA: 5-Aminosalicylic acid, AZP: Azathioprine, PSL: Prednisolone, UST: Ustekinumab, VDZ: Vedolizumab, ADA: Adalimumab
